# Supplementary material for: Reversible Thermo-Optical Response Nanocomposites Based on RAFT Symmetric Triblock Copolymers (ABA) of Acrylamide and N-Isopropylacrylamide and Gold Nanoparticles
Source: MDPI journal article supplement (doi:10.3390/polym15081963), 2023-04-21
Supplement: s1 [file s1]

Supplementary information

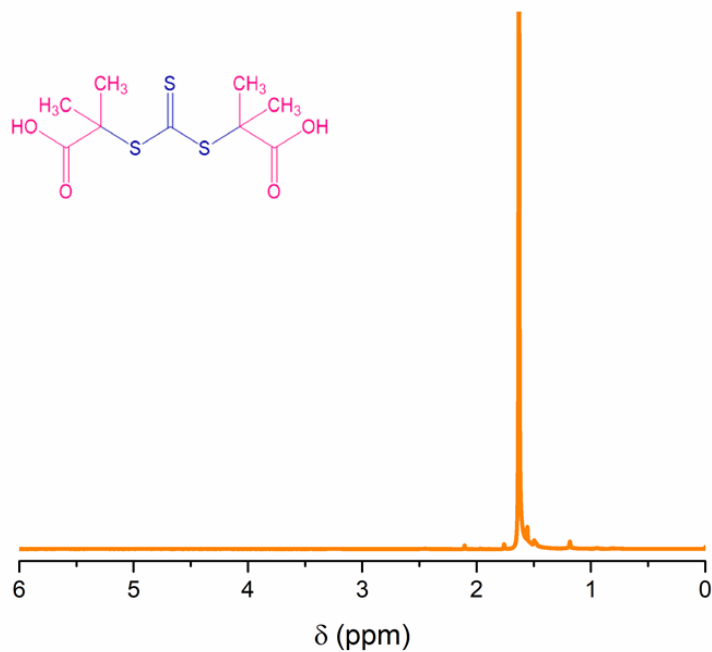

Figure S1.  $^1\text{H}$  NMR spectrum of the symmetric transfer agent 2,2'-(thiocarbonylbis(sulfanediyl))bis(2-methylpropanoic acid).

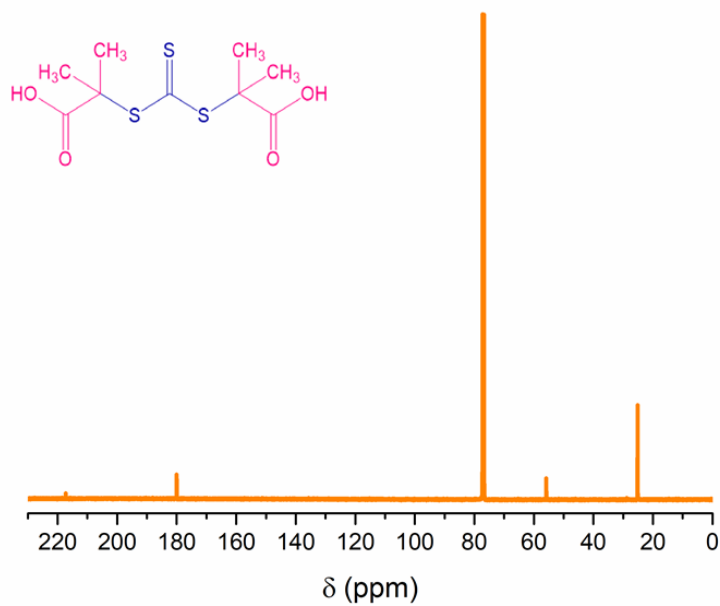

Figure S2.  $^{13}\text{C}$  NMR spectrum of the symmetric transfer agent 2,2'-(thiocarbonylbis(sulfanediyl))bis(2-methylpropanoic acid).

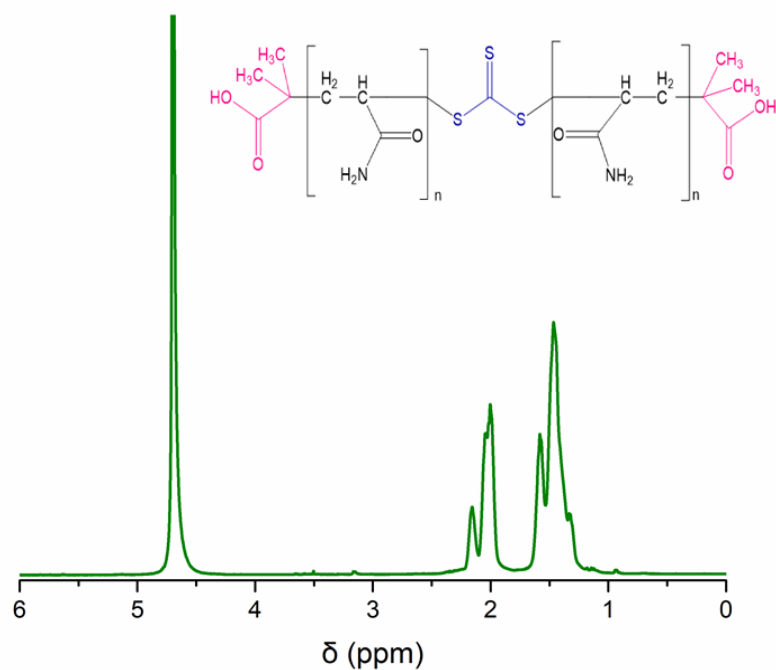

Figure S3.  $^1\text{H}$  NMR spectrum of the polyacrylamide block (PAM).

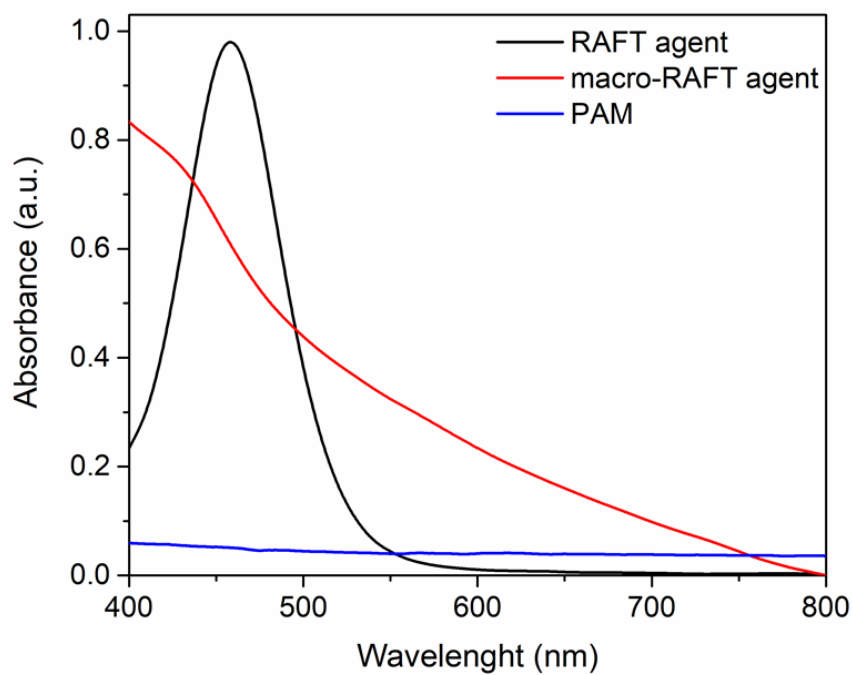

Figure S4. Comparison of UV-Vis spectra of symmetric transfer agent 2,2'-(thiocarbonylbis(sulfanediyl))bis(2-methylpropanoic acid), the macro-RAFT agent (the PAM block) and polyacrylamide (PAM) synthesized by inverse emulsion polymerization.

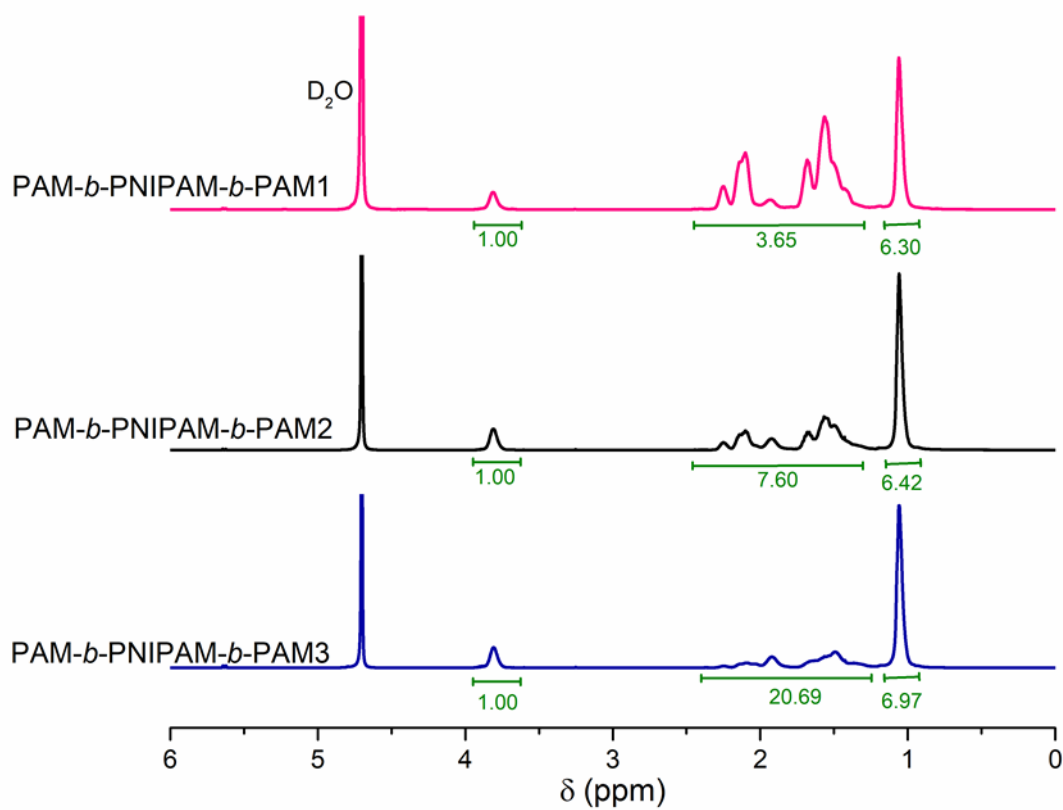

Figure S5.  $^1\text{H}$  NMR spectrum, with the signal integration of PAM-*b*-PNIPAM-*b*-PAM1, PAM-*b*-PNIPAM-*b*-PAM2 and PAM-*b*-PNIPAM-*b*-PAM3.
